# Supplementary material for: The synthesis of a 3d–4f polynuclear metal cluster under microwave irradiation: crystal structure and magnetic property of [La3Ni6(IDA)6(OH)6(H2O)12]·3NO3·15H2O (IDA = iminodiacetate)
Source: Royal Society of Chemistry journal article supplement (doi:10.1039/b823294f), 2009-01-01
Supplement: b823294f.pdf [file b823294f.pdf]

**Electronic Supplementary Information (ESI) for the manuscript “Synthesis of 3d-4f Polynuclear Metal Cluster under the Microwave Irradiation: Crystal Structure and Magnetic property of  $[\text{La}_3\text{Ni}_6(\text{IDA})_6(\text{OH})_6(\text{H}_2\text{O})_{12}] \cdot 3\text{NO}_3 \cdot 15\text{H}_2\text{O}$  (IDA = iminodiacetate)”**

**Gui-Lin Zhuang, Xiao-Jun Sun, La-Sheng Long,\* Rong-Bin Huang, Lan-Sun Zheng**

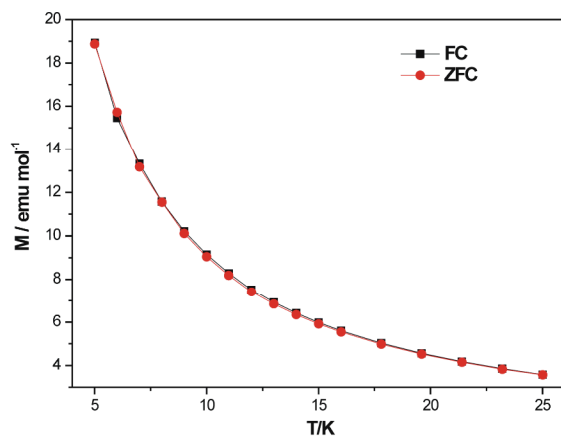

Fig. 1 Temperature dependences field-cooled ( $M_{\text{FC}}$ ) and zero-field-cooled ( $M_{\text{ZFC}}$ ) for **1** at an applied field of 10 Oe.
